# Supplementary material
Source: publisher site journal article supplement (https://www.dovepress.com/article/256760)
Supplement: Supplementary file 1 [file get_supplementary_file.php]

**Supplementary data**

**
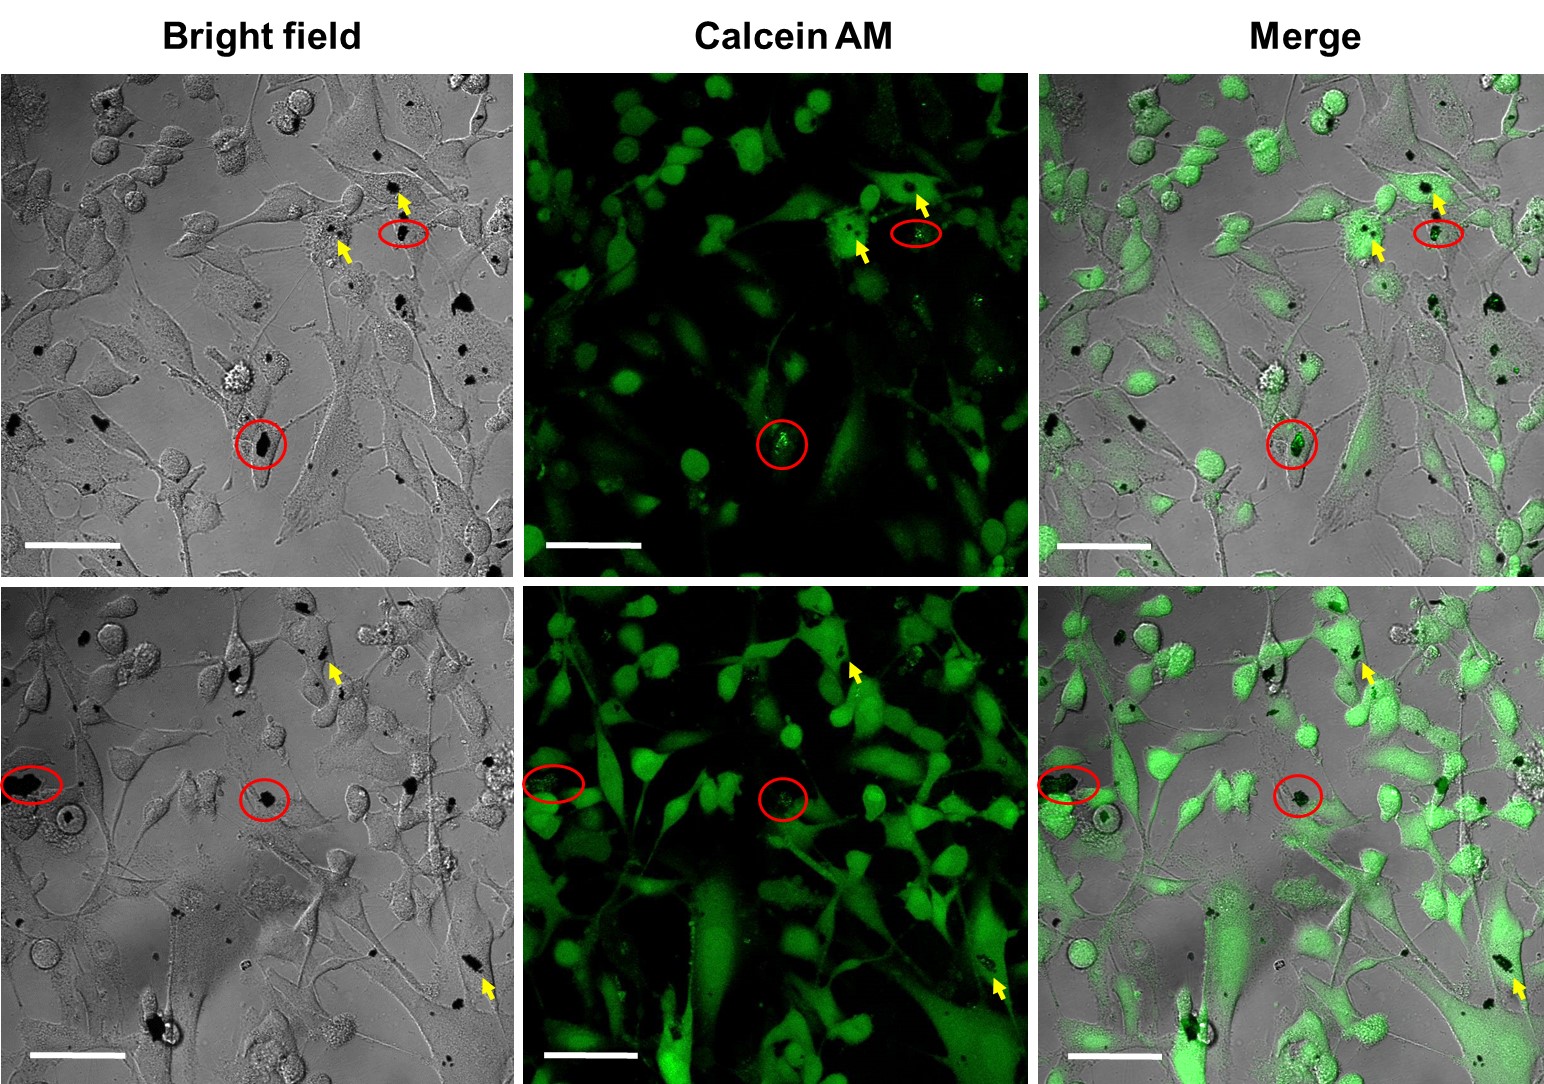
Figure S1.** Cells-nanocomposite interaction. Fluorescent confocal micrographs of HeLa cells with the nanocomposite pointed with yellow arrows for dark aggregates and rounded in red for intense fluorescent deposits. Scale bar is 5 µm.


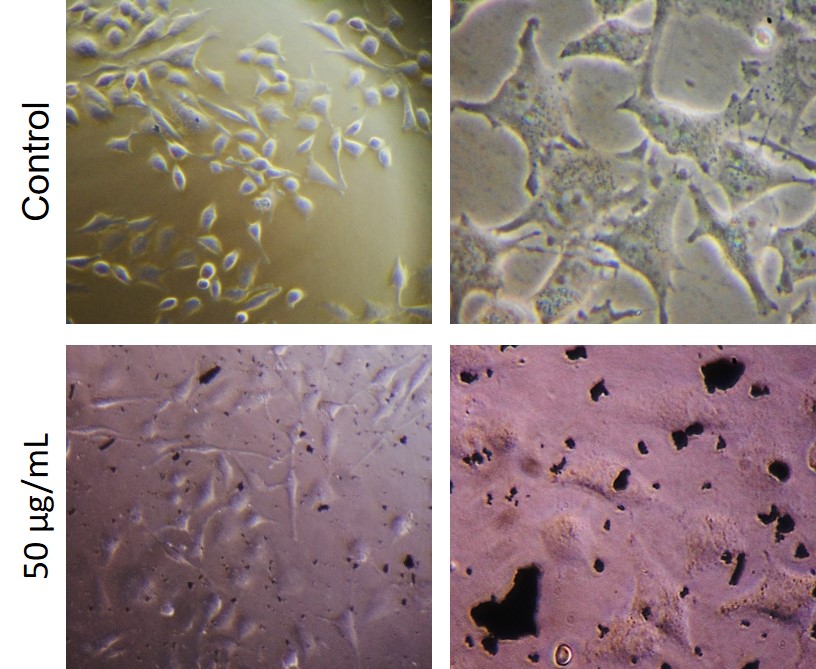


**Figure S2.** Cell morphology under graphene treatment. Morphology of HeLa cells observed by optical microscope under rGO-Fe3O4 treatment. Left image was observed at 10x and right image at 40x.
